# Supplementary material for: Evaluation of dispensaries’ cannabis flowers for accuracy of labeling of cannabinoids content
Source: PubMed Central journal article supplement (PMC10924369; doi:10.1186/s42238-024-00220-4), 2024-03-09
Supplement: 42238_2024_220_MOESM2_ESM.pdf [file 42238_2024_220_MOESM2_ESM.pdf]

**Table 2S. Observed Cannabinoids profile (%) of CBD, THCV, CBC,  $\Delta^8$ - THC, CBG, and CBN in Oregon.**

| Sample Code | CBD  | THCV | CBC  | $\Delta^8$ - THC | CBG  | CBN  |
|-------------|------|------|------|------------------|------|------|
| OR 1        | 0.04 | 0.09 | 0.16 | 0.10             | 0.42 | 1.95 |
| OR 2        | 0.08 | 0.11 | 0.21 | 0.18             | 0.60 | 0.08 |
| OR 3        | 0.07 | 0.17 | 0.30 | 0.13             | 0.50 | 0.11 |
| OR 4        | 0.06 | 0.16 | 0.99 | 0.48             | 2.00 | 0.43 |
| OR 5        | 0.06 | 0.08 | 0.26 | 0.12             | 0.63 | 0.30 |
| OR 6        | 0.06 | 0.10 | 0.24 | 0.26             | 1.27 | 0.27 |
| OR 7        | 0.08 | 0.13 | 0.47 | 0.34             | 0.96 | 0.30 |
| OR 8        | 0.04 | 0.10 | 0.35 | 0.32             | 0.30 | 1.18 |
| OR 9        | 0.07 | 0.05 | 0.29 | 0.31             | 0.84 | 0.12 |
| OR 10       | 0.06 | 0.15 | 0.44 | 0.34             | 1.20 | 0.28 |
| OR 11       | 0.03 | 0.11 | 0.47 | 0.37             | 2.39 | 0.28 |
| OR 12       | 0.05 | 0.09 | 0.32 | <0.01*           | 0.87 | 0.15 |
| OR 13       | 0.03 | 0.14 | 0.17 | 0.14             | 0.29 | 0.18 |
| OR 14       | 0.08 | 0.18 | 0.31 | <0.01*           | 0.66 | 0.19 |
| OR 15       | 0.07 | 0.17 | 0.24 | 0.22             | 1.30 | 0.12 |
| OR 16       | 0.04 | 0.46 | 0.35 | <0.01*           | 1.28 | 0.10 |
