# Supplementary material for: Evaluation of dispensaries’ cannabis flowers for accuracy of labeling of cannabinoids content
Source: PubMed Central journal article supplement (PMC10924369; doi:10.1186/s42238-024-00220-4), 2024-03-09
Supplement: 42238_2024_220_MOESM3_ESM.pdf [file 42238_2024_220_MOESM3_ESM.pdf]

**Table 3S. Observed Cannabinoids profile (%) of CBD, THCV, CBC,  $\Delta^8$ -THC, CBG, and CBN in SD California.**

| Sample Code | CBD  | THCV | CBC  | $\Delta^8$ - THC | CBG  | CBN  |
|-------------|------|------|------|------------------|------|------|
| SD Cal 1    | 0.04 | 0.14 | 0.28 | 0.20             | 0.51 | 0.23 |
| SD Cal 2    | 0.04 | 0.33 | 0.29 | 0.03             | 0.33 | 0.20 |
| SD Cal 3    | 0.03 | 0.67 | 0.26 | 0.01             | 0.36 | 0.17 |
| SD Cal 4    | 0.04 | 0.17 | 0.35 | 0.01             | 0.48 | 0.18 |
| SD Cal 5    | 0.03 | 0.07 | 0.19 | 0.18             | 0.23 | 0.38 |
| SD Cal 6    | 0.05 | 0.10 | 0.21 | 0.02             | 1.03 | 0.28 |
| SD Cal 7    | 0.05 | 0.20 | 0.57 | 0.50             | 1.17 | 0.39 |
| SD Cal 8    | 0.06 | 0.12 | 0.36 | 0.03             | 0.35 | 0.16 |
| SD Cal 9    | 0.04 | 0.12 | 0.19 | 0.28             | 0.56 | 0.13 |
| SD Cal 10   | 0.04 | 0.12 | 0.37 | 0.26             | 0.76 | 0.13 |
| SD Cal 11   | 0.03 | 0.08 | 1.39 | 0.16             | 0.65 | 0.36 |
| SD Cal 12   | 0.05 | 0.18 | 0.29 | 0.01             | 2.09 | 0.15 |
| SD Cal 13   | 0.04 | 0.10 | 0.64 | 0.02             | 0.76 | 0.12 |
| SD Cal 14   | 0.06 | 0.16 | 0.39 | 0.01             | 1.73 | 0.23 |
| SD Cal 15   | 0.05 | 0.12 | 0.23 | 0.21             | 0.41 | 0.15 |
| SD Cal 16   | 0.05 | 0.12 | 0.53 | 0.23             | 2.10 | 0.24 |
| SD Cal 17   | 0.04 | 0.12 | 0.19 | 0.26             | 0.50 | 0.39 |
| SD Cal 18   | 0.08 | 0.05 | 0.21 | 0.34             | 0.21 | 0.56 |
| SD Cal 19   | 0.05 | 0.14 | 0.24 | 0.24             | 0.66 | 0.24 |
| SD Cal 20   | 0.05 | 0.18 | 0.28 | 0.40             | 0.49 | 0.17 |
| SD Cal 21   | 0.05 | 0.19 | 0.59 | 0.17             | 0.04 | 1.05 |
| SD Cal 22   | 0.04 | 0.07 | 0.25 | 0.01             | 0.94 | 0.18 |
| SD Cal 23   | 0.05 | 0.15 | 0.24 | 0.13             | 1.30 | 0.09 |
| SD Cal 24   | 0.04 | 0.13 | 0.32 | 0.41             | 0.58 | 0.44 |
| SD Cal 25   | 0.04 | 0.11 | 0.43 | 0.12             | 0.47 | 0.29 |
| SD Cal 26   | 0.04 | 0.05 | 0.29 | 0.01             | 0.17 | 0.40 |
| SD Cal 27   | 0.05 | 0.08 | 0.20 | 0.11             | 0.51 | 0.23 |
| SD Cal 28   | 0.07 | 0.09 | 0.36 | 0.56             | 1.44 | 0.19 |
| SD Cal 29   | 0.04 | 0.08 | 0.16 | 0.35             | 0.39 | 0.21 |
| SD Cal 30   | 0.08 | 0.12 | 0.27 | 0.02             | 0.80 | 0.30 |
| SD Cal 31   | 0.07 | 0.12 | 0.27 | 0.01             | 0.94 | 0.20 |
| SD Cal 32   | 0.05 | 0.16 | 0.24 | 0.40             | 1.56 | 0.27 |
| SD Cal 33   | 0.05 | 0.14 | 0.21 | 0.03             | 1.13 | 0.29 |
| SD Cal 34   | 0.03 | 0.06 | 0.17 | 0.27             | 0.52 | 0.31 |
| SD Cal 35   | 0.05 | 0.18 | 0.27 | 0.17             | 0.55 | 0.13 |
| SD Cal 36   | 0.06 | 0.13 | 0.37 | 0.30             | 0.72 | 0.22 |
| SD Cal 37   | 0.03 | 0.06 | 0.19 | 0.01             | 0.69 | 0.15 |

|           |      |      |      |        |      |      |
|-----------|------|------|------|--------|------|------|
| SD Cal 38 | 0.08 | 0.10 | 0.17 | 0.14   | 0.20 | 1.31 |
| SD Cal 39 | 0.03 | 0.08 | 0.15 | 0.13   | 0.23 | 1.28 |
| SD Cal 40 | 0.07 | 0.12 | 0.23 | 0.33   | 0.51 | 0.59 |
| SD Cal 41 | 0.04 | 0.15 | 0.22 | <0.01* | 0.38 | 0.57 |
| SD Cal 42 | 0.04 | 0.06 | 0.19 | 0.26   | 0.43 | 0.72 |
| SD Cal 43 | 0.07 | 0.12 | 0.14 | <0.01* | 0.30 | 0.52 |
| SD Cal 44 | 0.08 | 0.13 | 0.32 | <0.01* | 0.86 | 0.66 |
| SD Cal 45 | 0.03 | 0.13 | 0.12 | 0.10   | 0.26 | 0.62 |
| SD Cal 46 | 0.04 | 0.04 | 0.30 | 0.04   | 0.74 | 0.68 |
| SD Cal 47 | 0.06 | 0.12 | 0.20 | <0.01* | 1.15 | 0.51 |
